# Supplementary material
Source: PubMed Central journal article supplement (PMC3258958)

## SUPPLEMENTAL DATA

### *NMR and MS data for fenclorim metabolites*

*S*-(4-Chloro-2-phenylpyrimidin-6-yl)-cysteine (FC) was recovered as a white amorphous solid (13.3 mg, 0.043 mmol, 43%); mp >140 °C dec. <sup>1</sup>H NMR (500 MHz, DMSO-*d*<sub>6</sub>): δ 8.45-8.43 (2H, m, *H*-2',6' on Ph), 7.68 (1H, s, *H*-5), 7.60-7.51 (3H, m, *H*-3',4',5' on Ph), 4.06 (1H, dd, *J* = 14.1, 4.0, 1H of the Cys*H*-β), 3.63 (1H, dd, *J* = 8.7, 4.0, Cys*H*-α), 3.38 (1H, dd, *J* = 14.1, 8.7, 1H of the Cys*H*-β); <sup>13</sup>C NMR (125 MHz, DMSO-*d*<sub>6</sub>): δ 171.7 (C4), 167.9 (C=O), 163.0 (C2), 158.9 (C6), 135.3 (C1'), 131.8 (C4'), 128.7 (C3',5'), 128.3 (C2',6'), 116.1 (C5), 53.2 (CysC-α), 31.0 (CysC-β); MS-ES<sup>+</sup> (*m/z*) 312 ([M + H]<sup>+</sup>, <sup>37</sup>Cl, 42), 310 ([M + H]<sup>+</sup>, <sup>35</sup>Cl, 100), 223 ([M - SCH<sub>2</sub>CHNH<sub>2</sub>COOH]<sup>+</sup>, <sup>35</sup>Cl, 6); HRMS-ES<sup>+</sup> (*m/z*) Calcd for C<sub>13</sub>H<sub>13</sub>O<sub>2</sub>N<sub>3</sub><sup>35</sup>ClS [M + H]<sup>+</sup>: 310.0412, found 310.0414.

*S*-(4-Chloro-2-phenylpyrimidin-6-yl)-glutathione (FG) was collected as a white fluffy solid (36.5 mg, 73.7 nmol, 74%); mp >200 °C dec. <sup>1</sup>H NMR (500 MHz, DMSO-*d*<sub>6</sub>): δ 8.79 (1H, br s, GlyNH), 8.71 (1H, d, *J* = 7.6, GluNH), 8.42 (2H, d, *J* = 7.5, *H*-2',6' on Ph), 7.62 (1H, s, *H*-5), 7.59-7.51 (3H, m, *H*-3',4',5' on Ph), 4.69-4.65 (1H, m, Cys*H*-α), 3.97 (1H, dd, *J* = 13.5, 3.8, 1H of the Cys*H*-β), 3.77-3.68 (2H, m, Gly*H*-α), 3.33-3.28 (2H, m, 1H of the Cys*H*-β and Glu*H*-α), 2.38-2.30 (2H, m, Glu*H*-γ), 1.99-1.79 (2H, m, Glu*H*-β); <sup>13</sup>C NMR (125 MHz, DMSO-*d*<sub>6</sub>): δ 172.6 (C=O), 172.3 (C=O), 171.6 (C=O), 171.2 (C4), 170.9 (C=O), 163.9 (C2), 159.7 (C6), 136.0 (C1), 132.5 (C4'), 129.5 (C3',5'), 129.0 (C2',6'), 116.7 (C5), 53.7 (GluC-α), 52.6 (CysC-α), 42.0 (GlyC-α), 32.1 (GluC-γ), 31.8 (CysC-β), 27.4 (GluC-β); MS-ES<sup>+</sup> (*m/z*) 537 ([M + H + MeCN]<sup>+</sup>, <sup>35</sup>Cl, 14%), 498 ([M + H]<sup>+</sup>, <sup>37</sup>Cl, 36), 496 ([M + H]<sup>+</sup>, <sup>35</sup>Cl, 100), 367 (20); HRMS-ES<sup>+</sup> (*m/z*) Calcd for C<sub>20</sub>H<sub>23</sub>O<sub>6</sub>N<sub>5</sub><sup>35</sup>ClS [M + H]<sup>+</sup>: 496.1052, found 496.1059.

*S*-(4-Chloro-2-phenylpyrimidin-6-yl)-γ-glutamylcysteine (FγEC) was collected as a white fluffy solid (12.8 mg, 0.12 mmol, 55 %); <sup>1</sup>H NMR (700 MHz, DMSO-*d*<sub>6</sub>): δ 8.59 (1H, br d, *J* = 7.7, NH), 8.39-8.37 (1H, m, *H*-2',6' on Ph), 7.61 (1H, s, *H*-5), 7.56-7.54 (1H, m, *H*-4' on Ph), 7.51-7.48 (2H, m, *H*-3',5' on Ph), 4.56-4.53 (1H, m, Cys*H*-α), 3.96 (1H, dd, *J* = 13.8, 4.6, 1H of the Cys*H*-β), 3.34-3.28 (2H, m, 1H of the Cys*H*-β and Glu*H*-α), 2.26 (2H, t, *J* = 7.7, Glu*H*-γ), 1.90-1.79 (2H, m, Glu*H*-β); <sup>13</sup>C NMR (176 MHz, DMSO-*d*<sub>6</sub>): δ 172.4 (Cquat), 172.2 (Cquat), 172.1 (Cquat), 170.2 (Cquat), 163.6 (C2), 159.5 (C6), 135.8 (C1'), 132.3 (C4'), 129.2 (C3',5'), 128.7 (C2',6'), 116.5 (C5), 53.6 (GluC-α), 52.2 (CysC-α), 32.2 (GluC-γ), 31.5 (CysC-β), 27.5 (GluC-β); MS-ES<sup>+</sup> (*m/z*) 441 ([M + H]<sup>+</sup>, <sup>37</sup>Cl, 40%), 439 ([M + H]<sup>+</sup>, <sup>35</sup>Cl, 100); HRMS-ES<sup>+</sup> (*m/z*) Calcd for C<sub>18</sub>H<sub>20</sub>N<sub>4</sub>O<sub>5</sub><sup>35</sup>Cl<sup>32</sup>S [M + H]<sup>+</sup>: 439.0838, found 439.0832.

*S*-(4-Chloro-2-phenylpyrimidin-6-yl)-*N*-malonylcysteine (FMC). The putative *N*-malonylcysteine conjugate (FMC) was purified from Arabidopsis cells fed with 300 μM fenclorim for 24 h, by preparative HPLC using the conditions described for the synthesis of conjugates. MS-ES<sup>+</sup> (*m/z*) 398 ([M + H]<sup>+</sup>, <sup>37</sup>Cl, 43%), 396 ([M + H]<sup>+</sup>, <sup>35</sup>Cl, 100); HRMS-ES<sup>+</sup> (*m/z*) Calcd for C<sub>16</sub>H<sub>14</sub>N<sub>3</sub>O<sub>5</sub><sup>35</sup>Cl<sup>32</sup>SNa [M + Na]<sup>+</sup>: 418.0235, found 418.0236.

*Methyl-esterification of FMC*. FMC (0.32 mg, 8.08 nmol) in anhydrous methanol (80 μL) was reacted for 1 h with 120 μL of a freshly prepared ethereal solution of diazomethane [S1]. Analysis by MS-ES<sup>+</sup> (*m/z*) 426 ([M + H]<sup>+</sup>, <sup>37</sup>Cl, 39%), 424 ([M + H]<sup>+</sup>, <sup>35</sup>Cl, 100), 223 (10), 202 (15); HRMS-ES<sup>+</sup> (*m/z*) Calcd for C<sub>18</sub>H<sub>18</sub>N<sub>3</sub>O<sub>5</sub><sup>35</sup>Cl<sup>32</sup>SNa [M + Na]<sup>+</sup>: 446.0548, found 446.0548.

*S*-(4-*N*-Acetylcysteine-2-phenylpyrimidin-6-yl)-glutathione (FACG). Prepared according to the standard procedure using FG (1.0 mg, 2.1  $\mu$ mol) and *N*-acetyl-cysteine (0.7 mg, 4.2  $\mu$ mol). MS-ES<sup>+</sup> (*m/z*) 623 ([M + H]<sup>+</sup>, 27%), 494 (12), 365 (11), 350 (25), 298 (25), 221 (100), 199 (35), 145 (59), 130 (35), 121 (25); HRMS-ES<sup>+</sup> (*m/z*) Calcd for C<sub>25</sub>H<sub>31</sub>N<sub>6</sub>O<sub>9</sub><sup>32</sup>S<sub>2</sub> [M + H]<sup>+</sup>: 623.1589, found 623.1591.

*S*-(4-*N*-Acetylcysteine-2-phenylpyrimidin-6-yl)-cysteine (FACC). Prepared according to the standard procedure using FC (0.9 mg, 3.0  $\mu$ mol) and *N*-acetyl-cysteine (1.0 mg, 6.0  $\mu$ mol); MS-ES<sup>+</sup> (*m/z*) 437 ([M + H]<sup>+</sup>, 100%); HRMS-ES<sup>+</sup> (*m/z*) Calcd for C<sub>18</sub>H<sub>21</sub>N<sub>4</sub>O<sub>5</sub><sup>32</sup>S<sub>2</sub> [M + H]<sup>+</sup>: 437.0948, found 437.0952.

4-Chloro-6-(methylthio)-2-phenylpyrimidine (CMTP). To a solution of fenclorim (1.35 g, 6.00 mmol) in anhydrous DMF (12 ml) was added sodium thiomethoxide (0.082 g, 1.17 mmol) with stirring under an atmosphere of argon for 30 min. Distilled water (12 ml) was added followed by ethyl acetate (10 ml) and the resulting solution washed with brine (2  $\times$  10 ml). The combined aqueous phases were washed with ethyl acetate (2  $\times$  10 ml). The organic layers were dried (MgSO<sub>4</sub>), filtered and concentrated *in vacuo*. Purification by flash column chromatography on silica gel (chloroform: petroleum ether 40-60 °C 1:19) gave CMTP as a white solid (0.088 g, 0.37 mmol, 32%); mp 78-79 °C (lit. 80-81 °C petroleum ether [S2]), together with 4,6-bis(methylthio)-2-phenylpyrimidine as a white solid (0.060 g, 0.24 mmol, 21%). The CMTP was analyzed by <sup>1</sup>H NMR (500 MHz, CDCl<sub>3</sub>):  $\delta$  8.46-8.44 (2H, m, *H*-2',6' on Ph), 7.51-7.46 (3H, m, *H*-3',4',5' on Ph), 7.10 (1H, s, *H*-5), 2.68 (3H, s, CH<sub>3</sub>); <sup>13</sup>C NMR (126 MHz, CDCl<sub>3</sub>):  $\delta$  172.3 (C6), 164.1 (C2), 159.5 (C4), 136.1 (C1'), 131.5 (C4'), 128.6 (ArC), 128.5 (ArC), 115.4 (C5), 12.8 (CH<sub>3</sub>); MS-ES<sup>+</sup> (*m/z*) 239 ([M + H]<sup>+</sup>, <sup>37</sup>Cl, 38%), 237 ([M + H]<sup>+</sup>, <sup>35</sup>Cl, 100); HRMS-ES<sup>+</sup> (*m/z*) Calcd for C<sub>11</sub>H<sub>10</sub>N<sub>2</sub><sup>35</sup>Cl<sup>32</sup>S [M + H]<sup>+</sup>: 237.0248, found 237.0248.

*S*-(4-(methylthio)-2-phenylpyrimidin-6-yl)-*N*-malonylcysteine (MPMC) HRMS-ES<sup>+</sup> (*m/z*) Calcd for C<sub>17</sub>H<sub>18</sub>N<sub>3</sub>O<sub>5</sub><sup>32</sup>S<sub>2</sub> [M + H]<sup>+</sup>: 408.0682, found 408.0688.

## REFERENCES

- S1. de Boer, Th. J., Backer, H. J. (1963) *Org. Synth. Coll.* **4**, 250; (1956), 36, 16.
- S2. Meervelt, L. V., Smolii, O. B., Mishchenko, N. I., Shakhnin, D. B., Romanenko, E. A., and Drach, B. S. (1996) *Tetrahedron* **52**, 8835-8852.

## SUPPLEMENTAL FIGURE LEGEND

Supplemental fig. Profile of metabolites (A) in *Arabidopsis* root cultures 24 h after treatment with 100  $\mu$ M fenclorim and (B) in rice shoots grown on agar containing 100  $\mu$ M fenclorim for 4 days. Numbered peaks correspond to metabolites identified in fig. 3B.

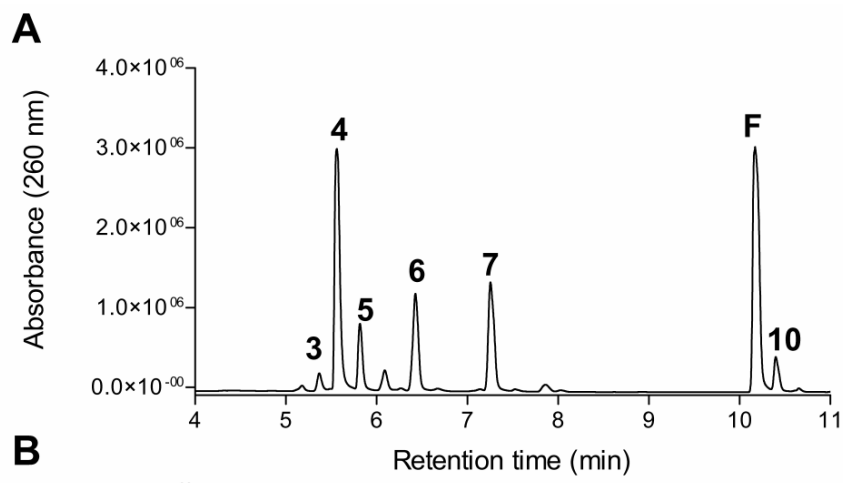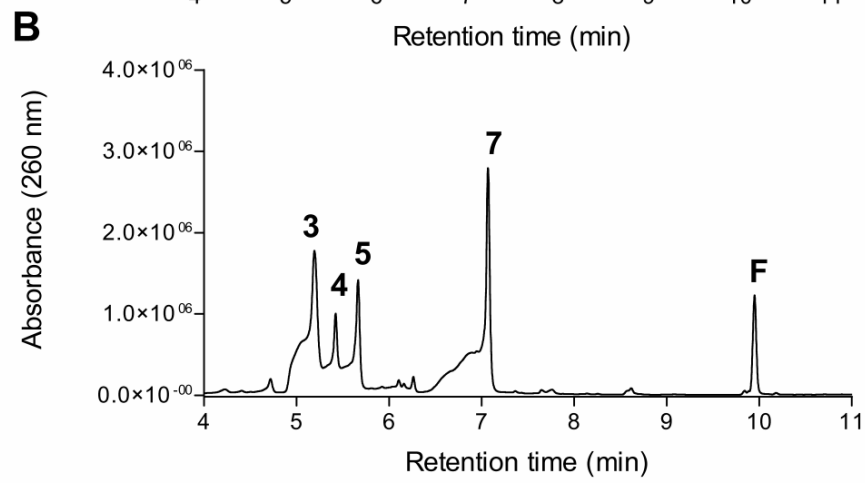

Supplement: supp_M801998200_Revised_version_supplemental_data.pdf [file supp_M801998200_Revised_version_supplemental_data.pdf]
